# Supplementary material for: Iridoids Isolation from a Phytochemical Study of the Medicinal Plant Teucrium parviflorum Collected in Iraqi Kurdistan
Source: MDPI journal article supplement (doi:10.3390/molecules27185963), 2022-09-13
Supplement: s1 [file s1]

# **Iridoids isolation from a phytochemical study of the medicinal plant *Teucrium parviflorum* collected in Iraqi Kurdistan**

## **SUPPLEMENTARY MATERIALS**

- S1. <sup>1</sup>H-NMR spectrum of harpagide (1)
- S2. <sup>13</sup>C-NMR spectrum of harpagide (1)
- S3. <sup>1</sup>H-NMR spectrum of 8-O-acetylharpagide (2)
- S4. <sup>13</sup>C-NMR spectrum of 8-O-acetylharpagide (2)

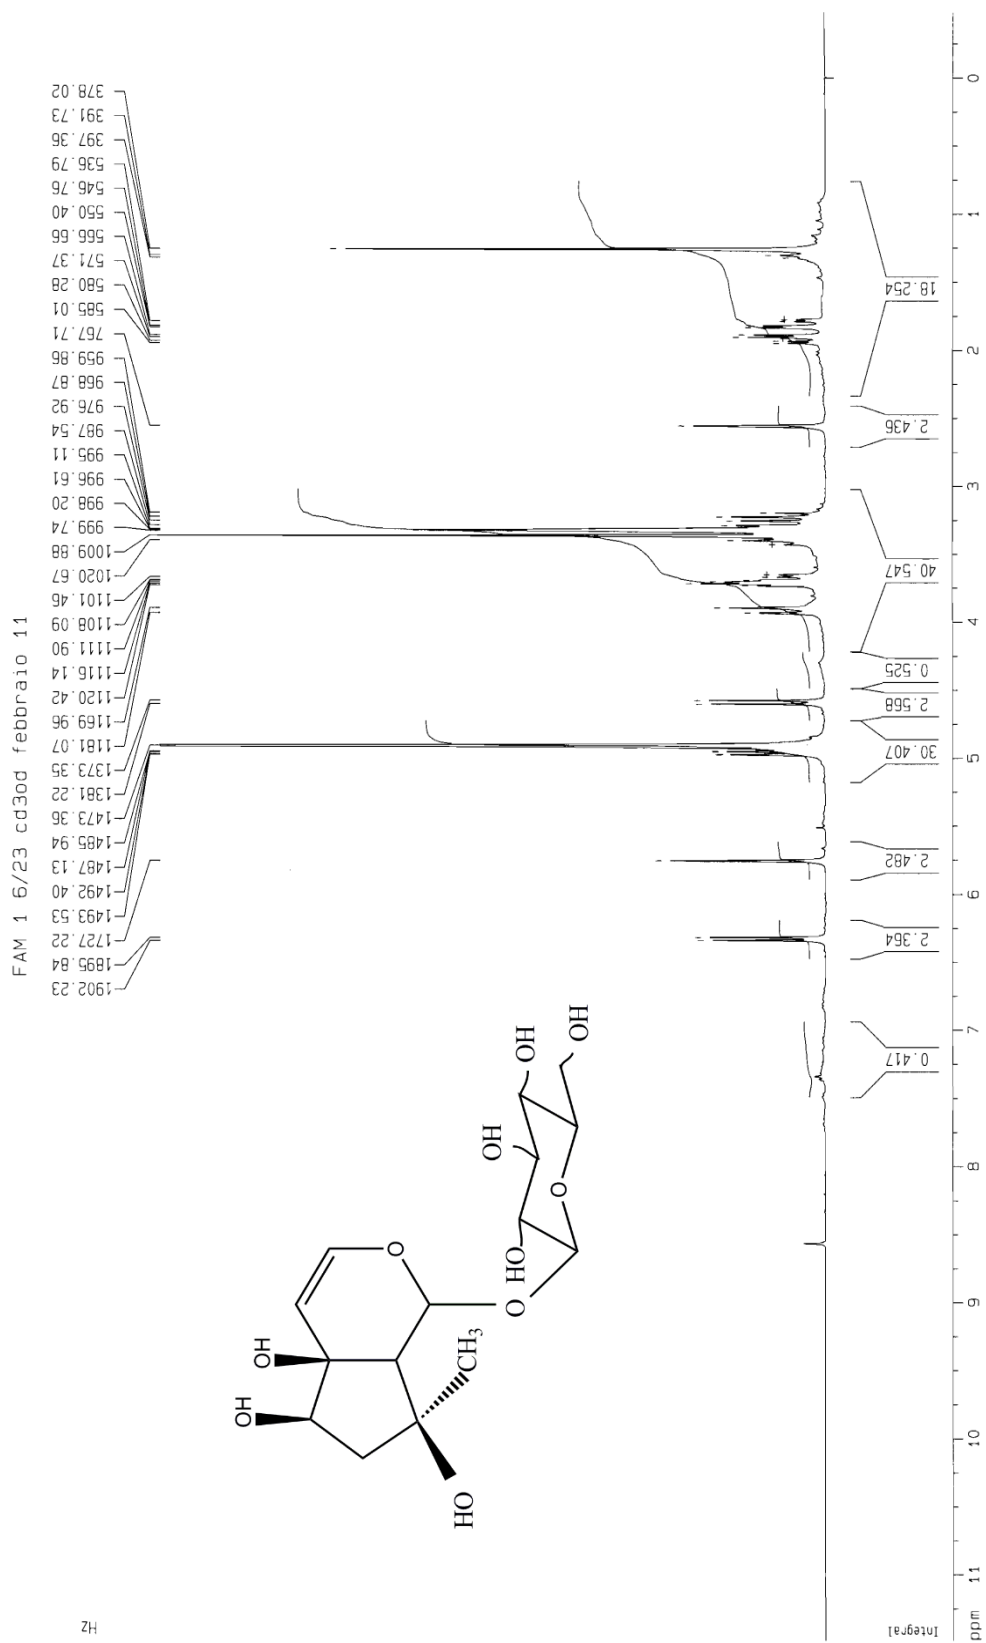

**Figure S1.**  $^1\text{H}$ -NMR spectrum of harpagide (**1**) ( $\text{MeOH-d}_4$ , 300 MHz).

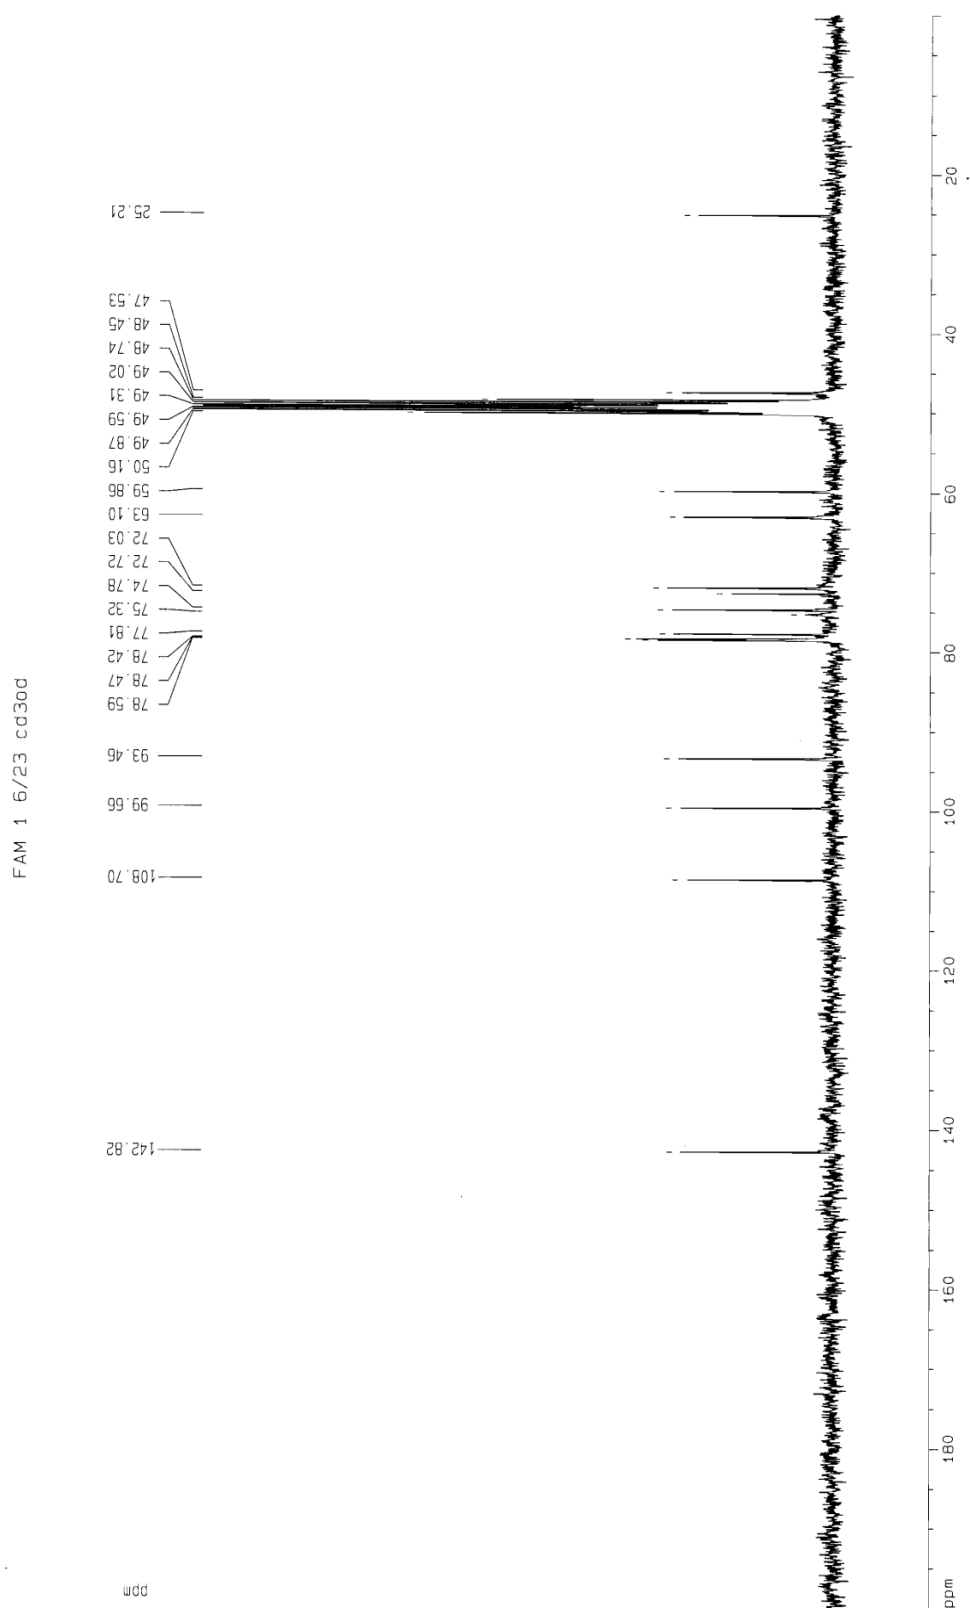

**Figure S2.**  $^{13}\text{C}$ -NMR spectrum of harpagide (**1**) ( $\text{MeOH-d}_4$ , 75 MHz).

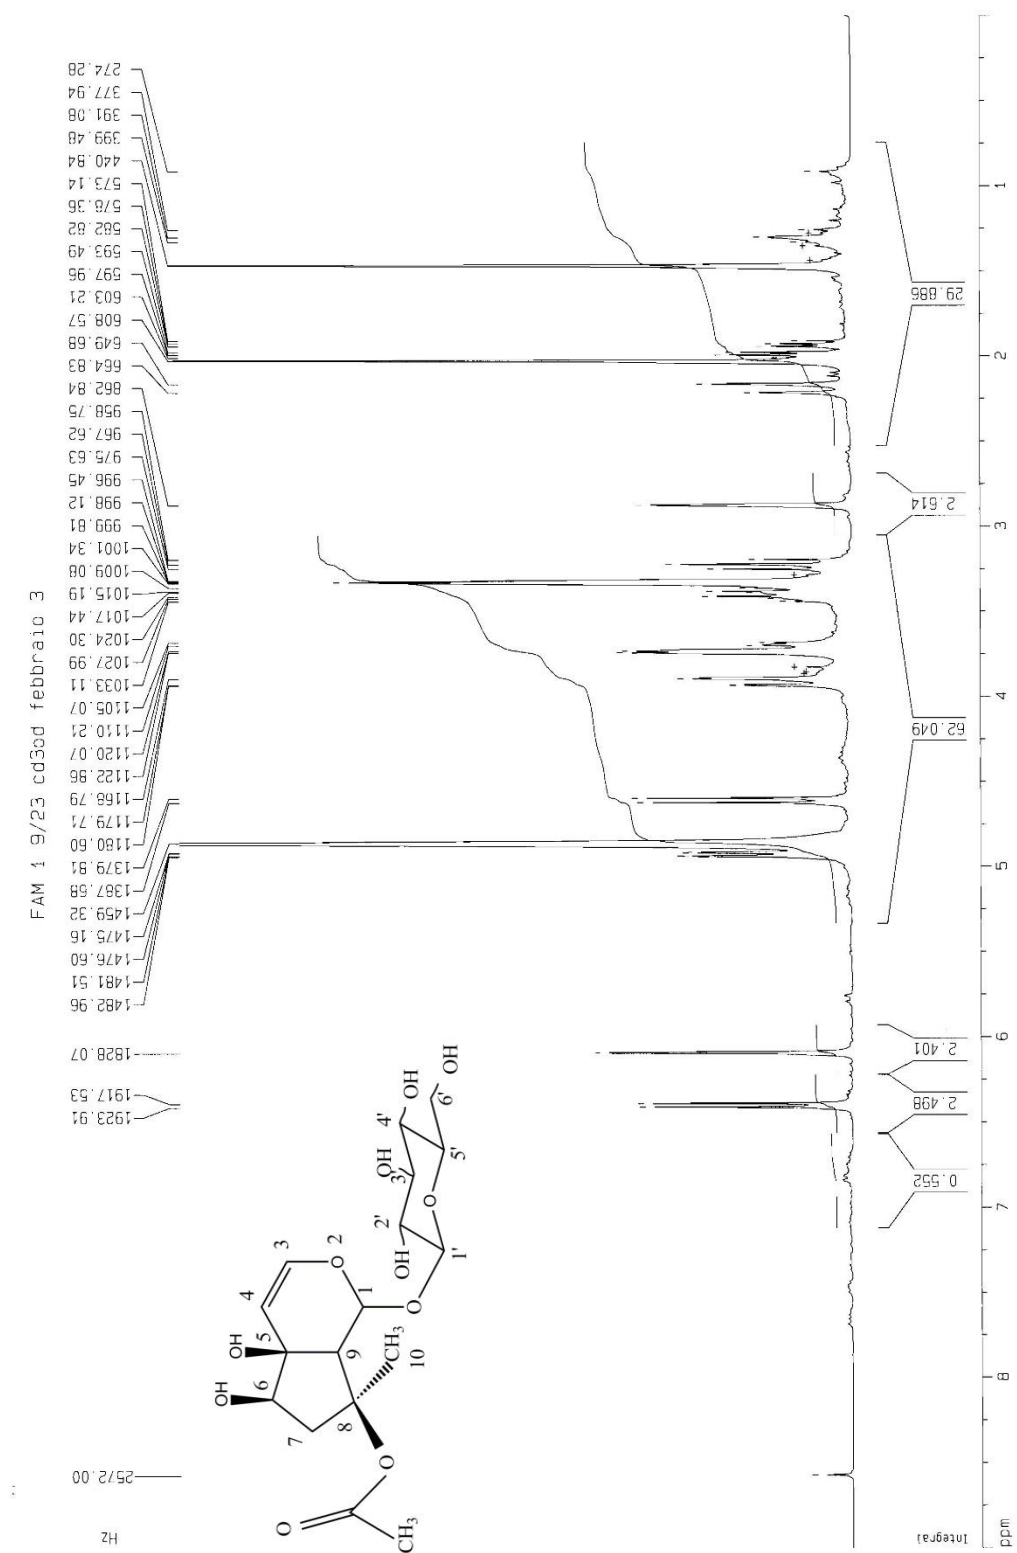

**Figure S3.** <sup>1</sup>H-NMR spectrum of 8-O-acetylharpagide (**2**) (MeOH-d<sub>4</sub>, 300 MHz).

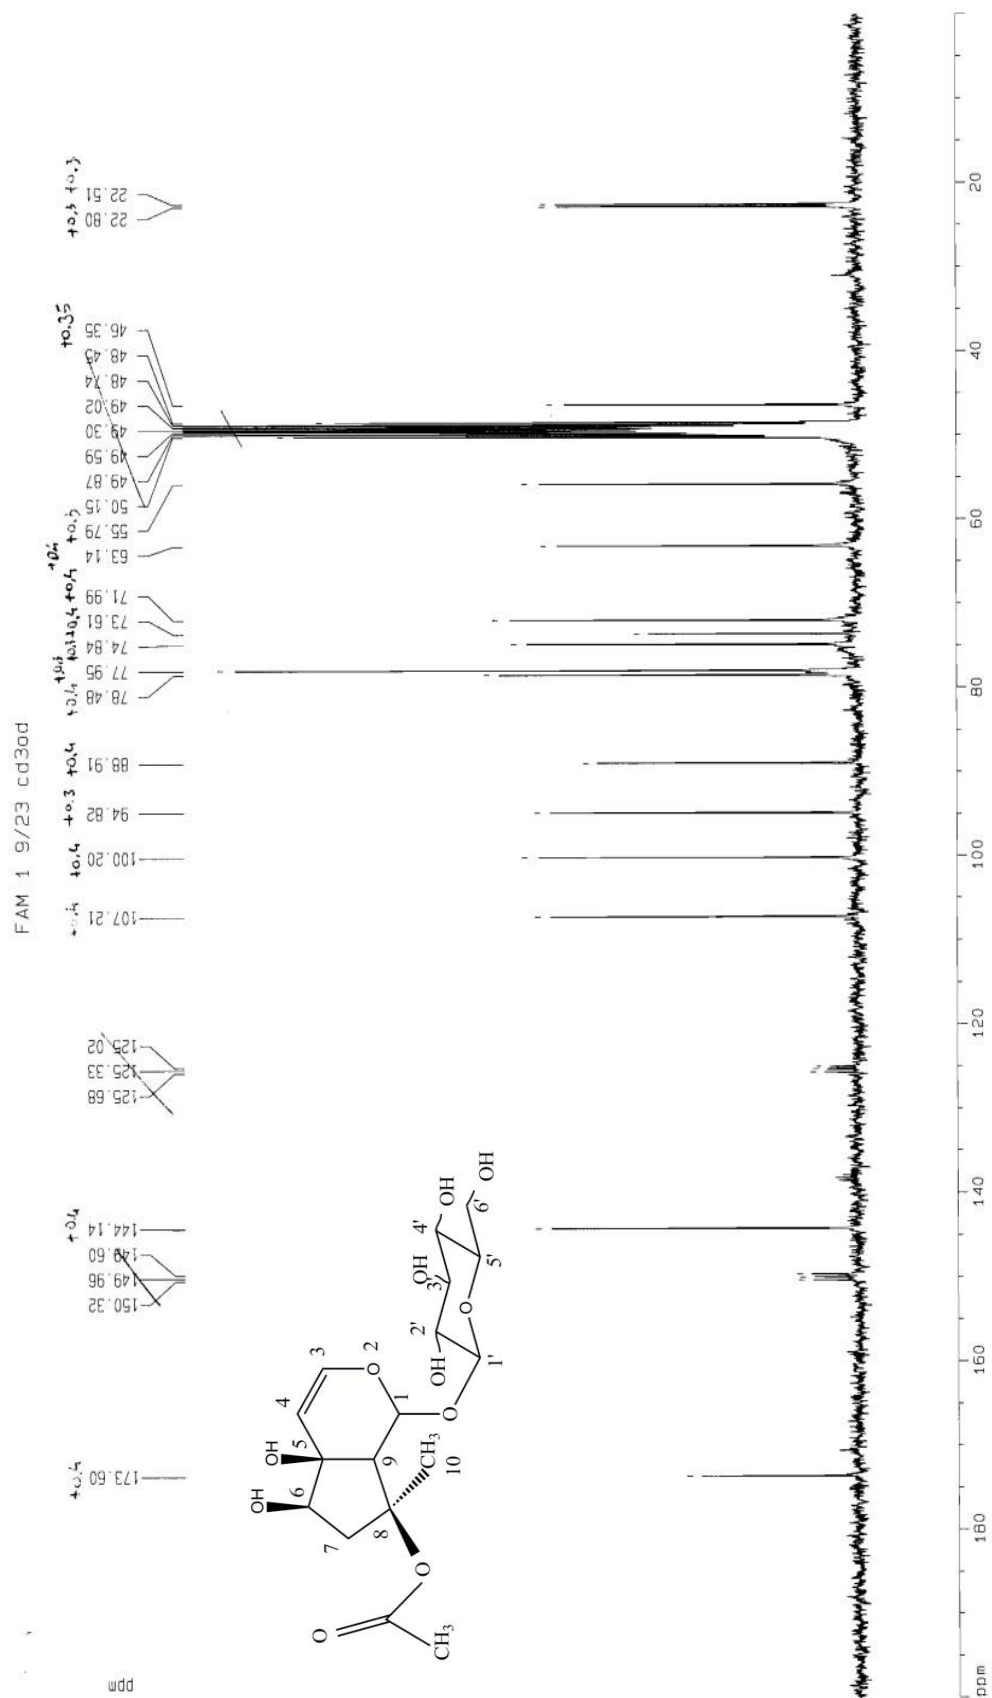

**Figure S4.** <sup>13</sup>C-NMR spectrum of 8-O-acetylharpagide (**2**) (MeOH-d<sub>4</sub>, 75 MHz).
